# Supplementary material for: Stimuli responsive multicolour fluorescence emission in carbon nanodots and application in metal free hydrogen evolution from water
Source: Royal Society of Chemistry journal article supplement (doi:10.1039/d0na00799d), 2020-12-10
Supplement: d0na00799d1.pdf [file d0na00799d1.pdf]

## Stimuli Responsive Multicolour Fluorescence Emission in Carbon Nanodots and Application in Metal Free Hydrogen Evolution from Water

Subir Paul<sup>[a]</sup> and Arindam Banerjee<sup>[a]</sup> \*

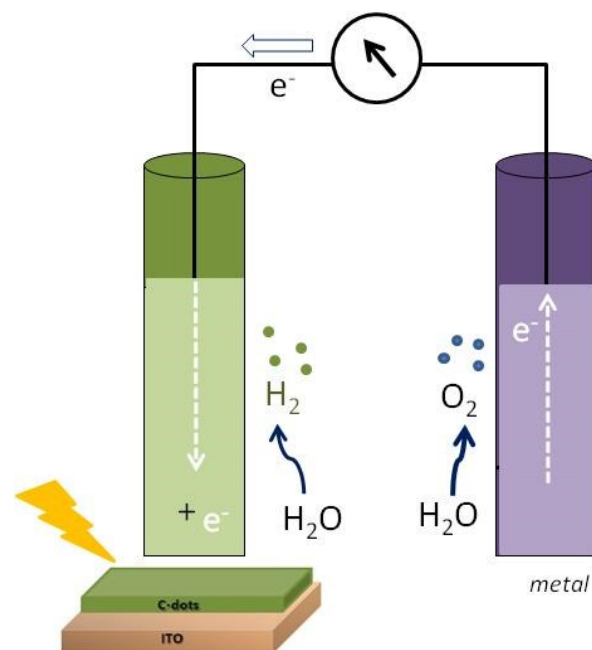

**Fig. S1:** Device setup for hydrogen evolution reaction.

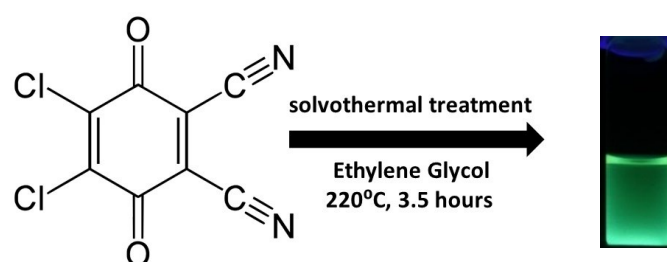

**Fig. S2:** Synthesis of C-dots1.

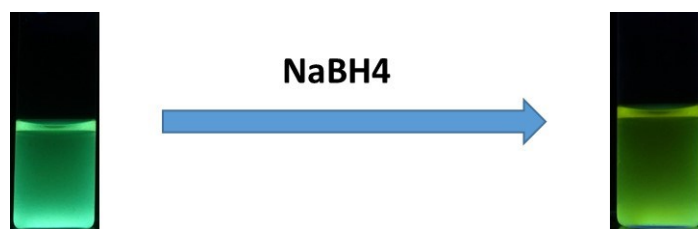

**Fig. S3:** Formation of C-dots2 from C-dots1 through  $\text{NaBH}_4$  reduction.

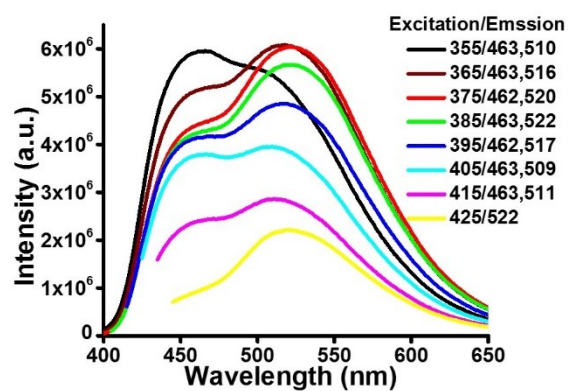

**Fig. S4:** Fluorescence spectra of C-dots1 at different excitation wavelengths.

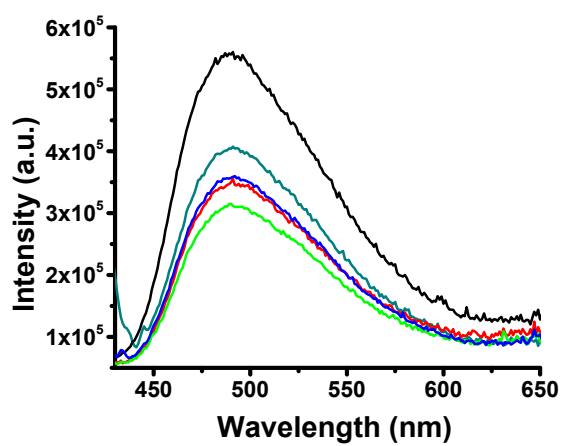

**Fig. S5:** Cyan solid state fluorescence spectra of carbon dots at different excitation wavelengths .

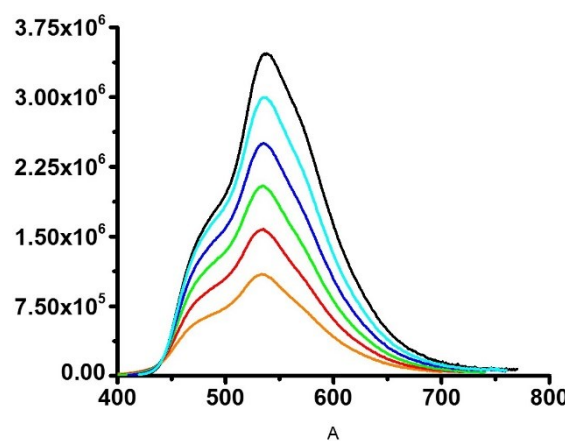

**Fig. S6:** Green solid state fluorescence spectra of carbon dots at different excitation wavelengths .

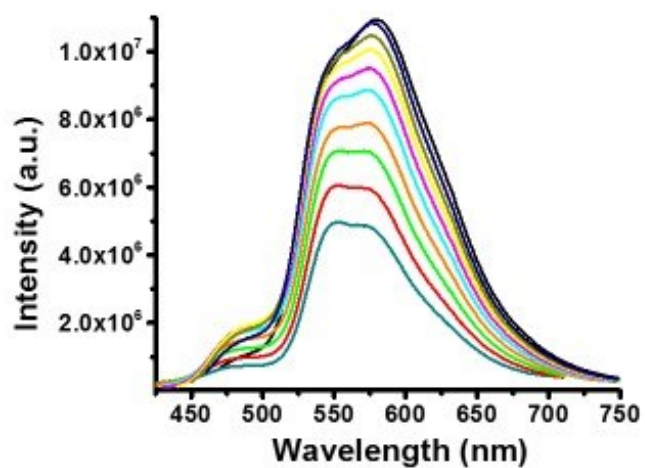

**Fig. S7:** Yellow solid state fluorescence spectra of carbon dots at different excitation wavelengths .

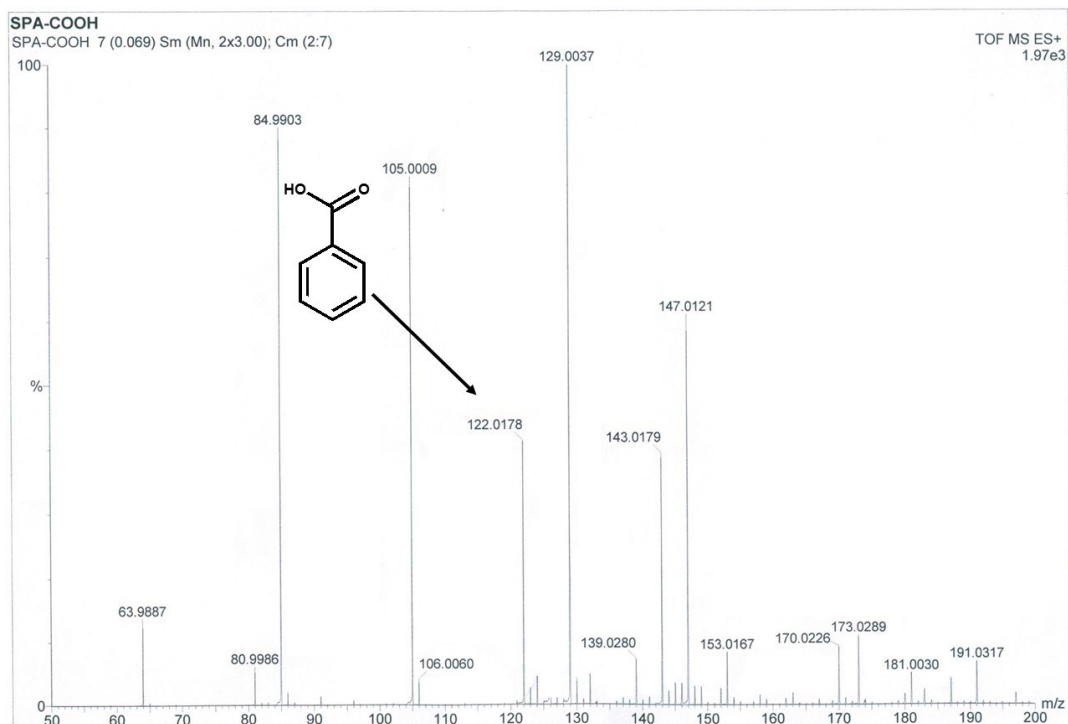

**Fig. S8:** Mass spectrum of benzyl alcohol oxidation products using C-dots2 in presence of visible light indicating the presence of benzoic acid.

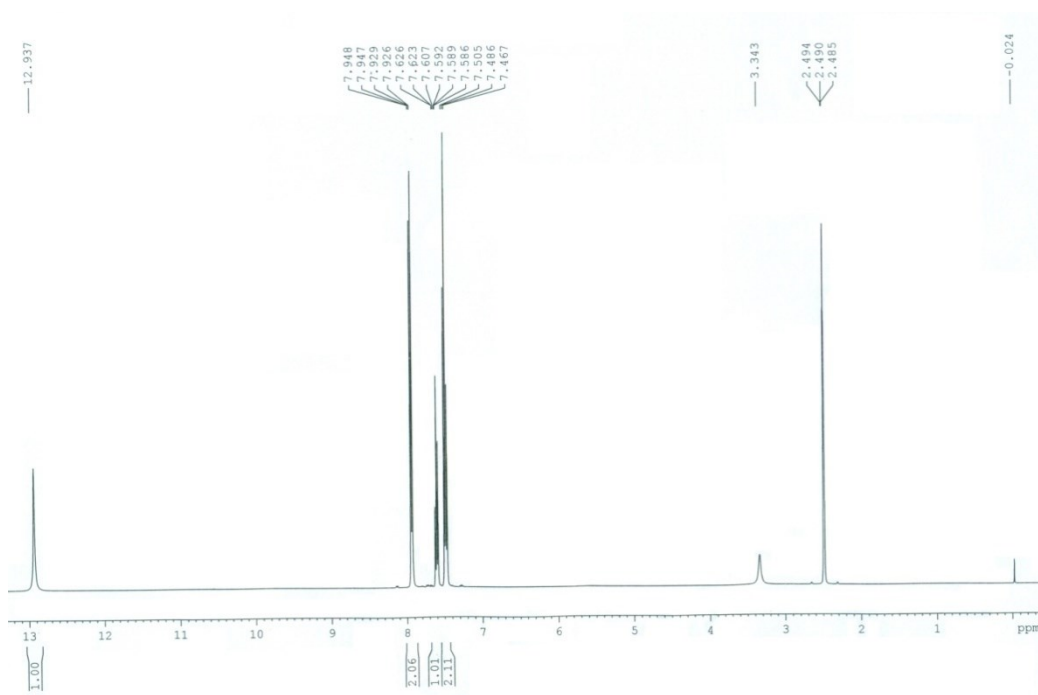

**Fig. S9:** NMR spectrum of benzoic acid formed by oxidation of benzyl alcohol with C-dots2.
